# Supplementary material
Source: PubMed Central journal article supplement (PMC3075284)
Supplement: supp_00532.2010_figS2-S4.pdf [file supp_00532.2010_figS2-S4.pdf]

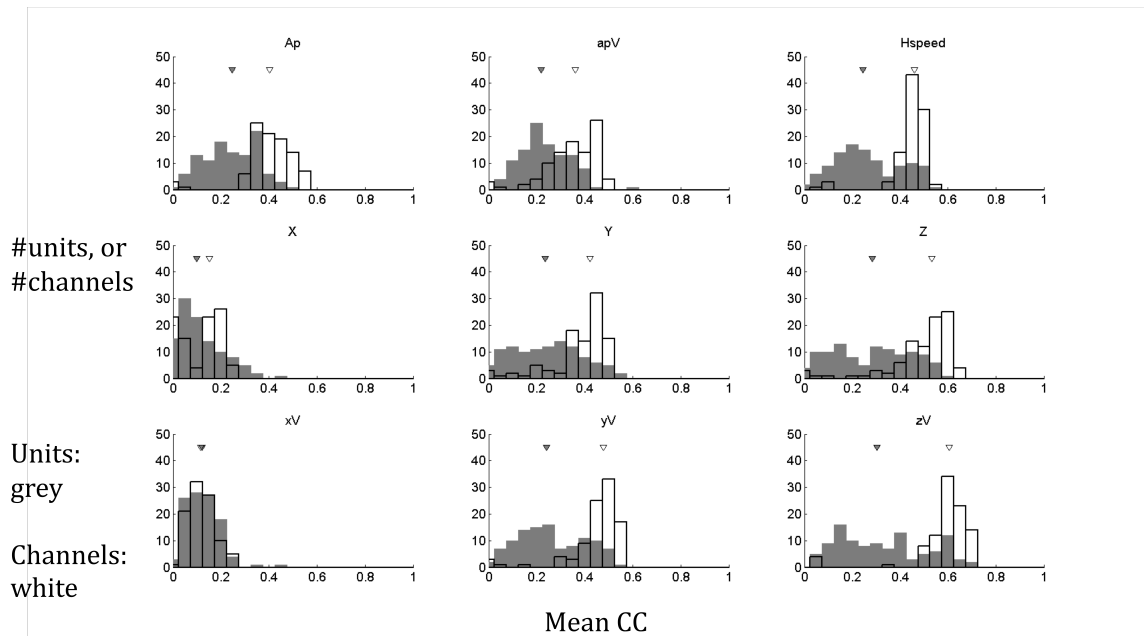

**Supplementary Figure 2a: Comparison of individual units vs individual channel decoding performance.** Distribution of cross-correlations when using individual units (grey) versus using individual lf-LFP channels (white). Inverted triangles represent the corresponding medians of the distributions. For all comparisons (except x-position and x-velocity, where  $p > 0.75$ ), the medians were significantly different ( $p < 10^{-11}$ , Kruskal-Wallis test). (**Monkey G, Session 2, PMv array**).

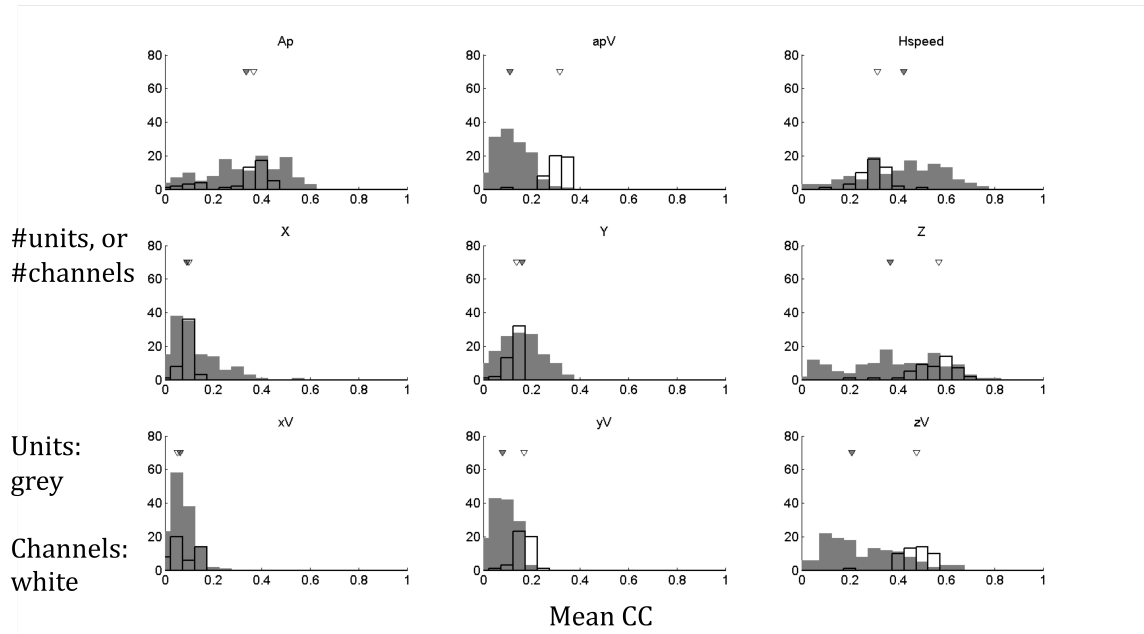

**Supplementary Figure 2b: Comparison of individual units vs individual channel decoding performance.** Distribution of cross-correlations when using individual units (grey) versus using individual lf-LFP channels (white). Inverted triangles represent the corresponding medians of the distributions. For all comparisons (except aperture, x-position and x-velocity, where  $p > 0.5$ ), the medians were significantly different ( $p < 10^{-4}$ , Kruskal-Wallis test, except y-position where  $p < 0.05$ ). (Monkey C, Session 1, MI array).

Supplementary Figure 3 a)

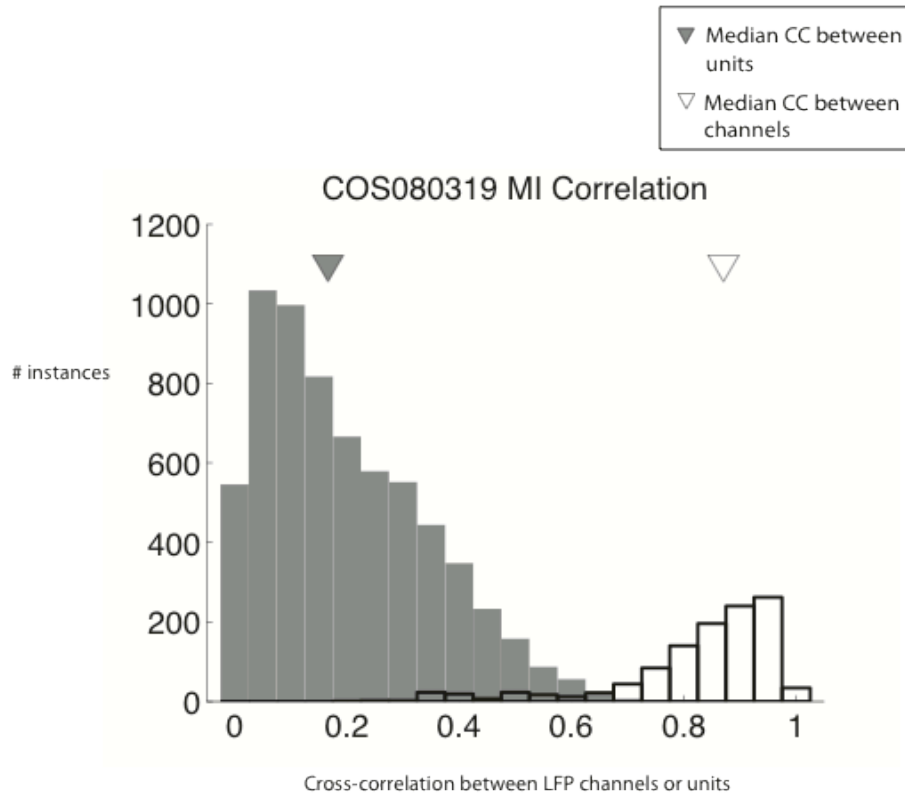

b)

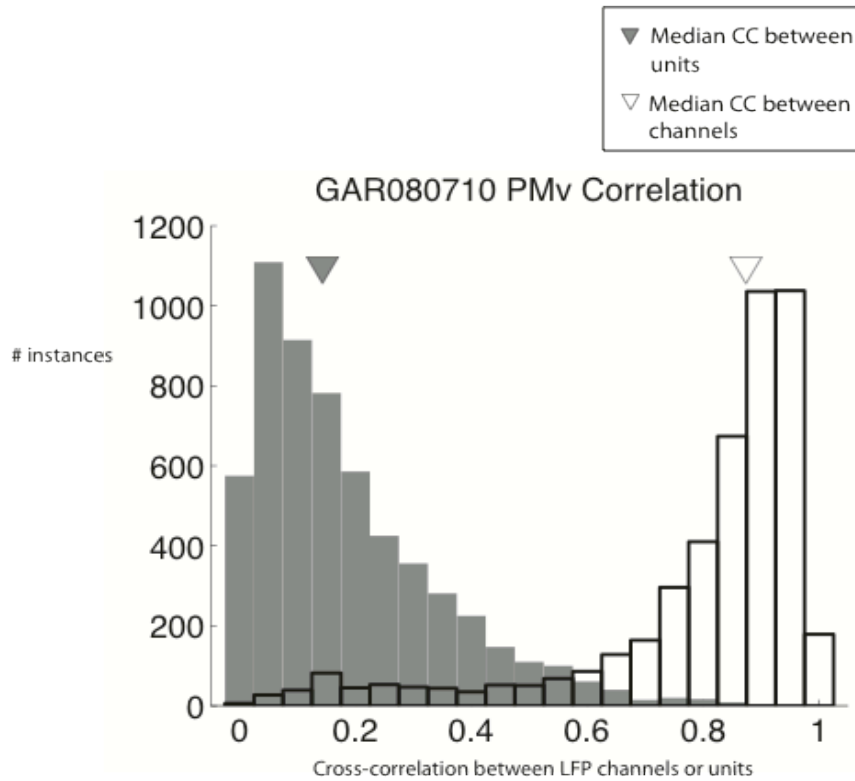

**Supplementary Figure 3: Relative independence of *lf*-LFPs and spiking units.** Histograms of correlation-coefficient (Pearson's  $r$ ) between all pairs of simultaneously recorded *lf*-LFPs (white), or all pairs of simultaneously recorded spiking units (grey) during (a) Monkey C, MI, Session 2, and (b) Monkey G, PMv, Session 2.

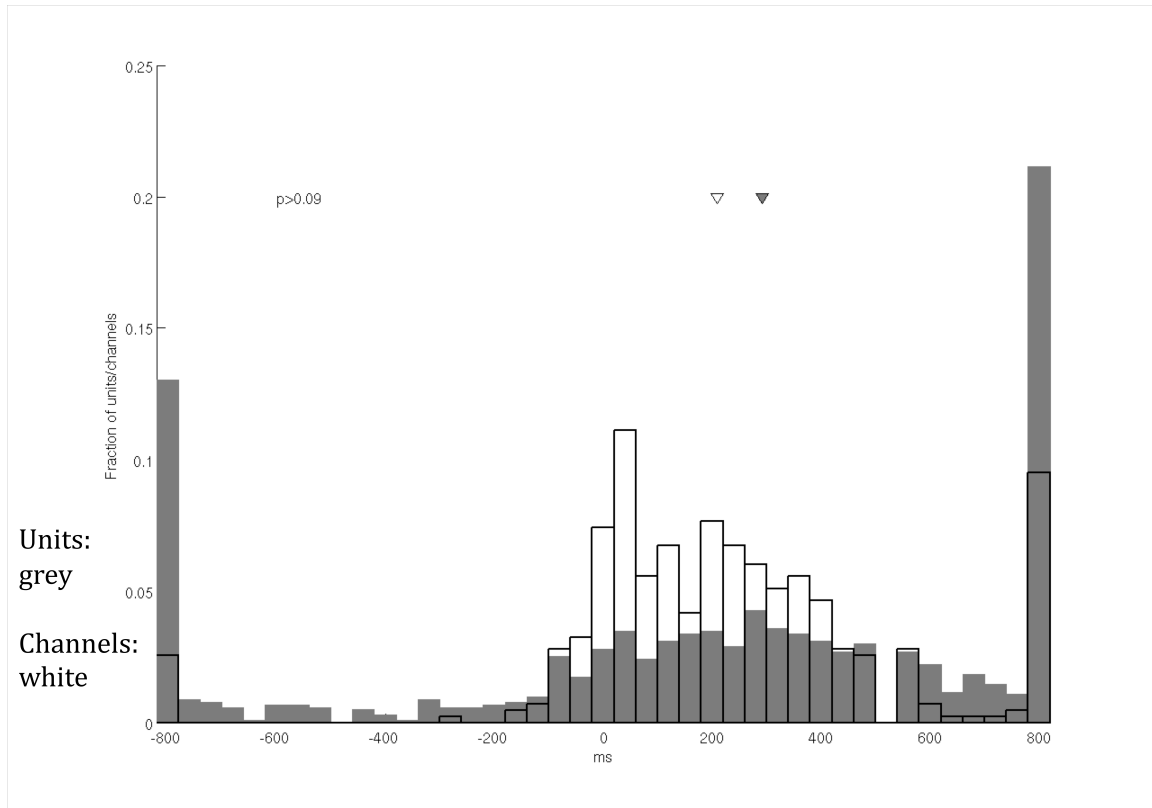

**Supplementary Figure 4a: Comparison of individual unit versus individual channel optimal lags (Monkey C, Session 2, MI).** Distribution of channels/units with different optimal lags. Inverted triangles represent median optimal lag. Grey: Units; White: Channels.

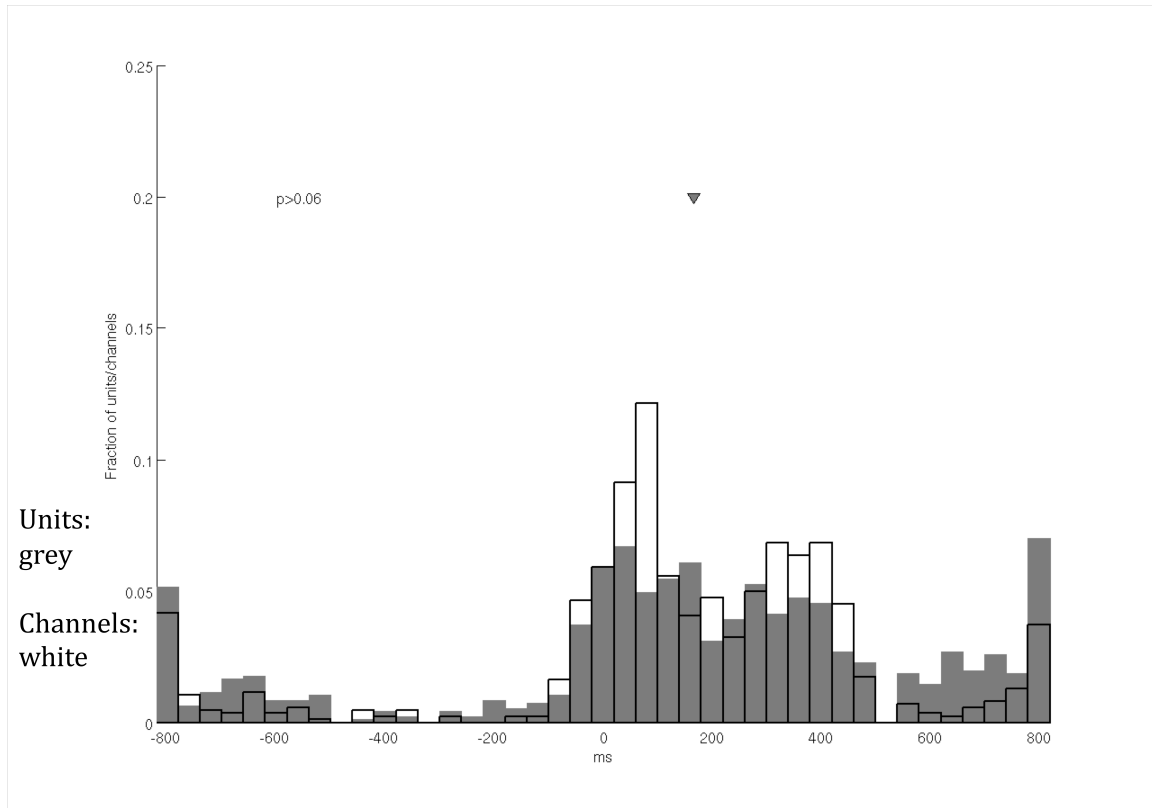

**Supplementary Figure 4b: Comparison of individual unit versus individual channel optimal lags (Monkey G, Session 2, PMv).** Distribution of channels/units with different optimal lags. Inverted triangles represent median optimal lag. Grey: Units; White: Channels.
